# Supplementary material for: CD4+versusCD8+ T-lymphocyte identification in an integrated microfluidic chip using light scattering and machine learning
Source: Royal Society of Chemistry journal article supplement (doi:10.1039/c9lc00695h), 2019-01-01
Supplement: c9lc00695h1.pdf [file c9lc00695h1.pdf]

# CD4+ versus CD8+ T-lymphocytes identification in integrated microfluidic chip using light scattering and machine learning

Domenico Rossi<sup>1</sup>, David Dannhauser<sup>1</sup>, Mariarosaria Telesco<sup>1</sup>, Paolo A. Netti<sup>1,2</sup> & Filippo Causa<sup>2</sup>

<sup>1</sup> Center for Advanced Biomaterials for Healthcare@CRIB, Istituto Italiano di Tecnologia (IIT), Largo Barsanti e Matteucci 53, 80125 Naples, Italy.

<sup>2</sup> Interdisciplinary Research Centre on Biomaterials (CRIB) and Dipartimento di Ingegneria Chimica, dei Materiali e della Produzione Industriale, Università degli Studi di Napoli "Federico II", Piazzale Tecchio 80, 80125 Naples, Italy.

\*Correspondence to: [causa@unina.it](mailto:causa@unina.it)

## Supplementary information

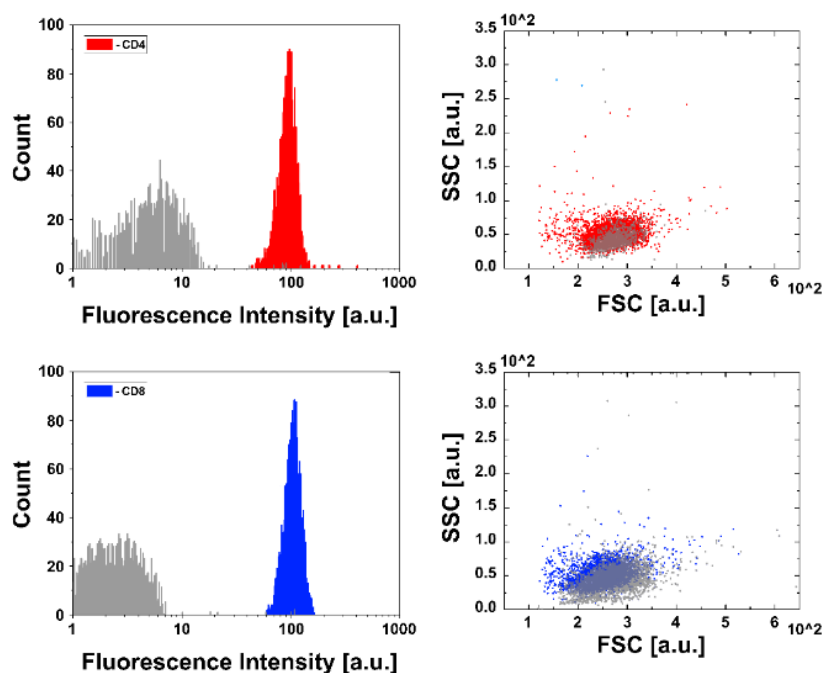

**Supplementary fig. 1** Flow cytometry reference test have been performed to assure the purity of the T-lymphocytes subclasses isolation. A part of CD4+ and CD8+ was dedicated to this reference test and are not used for the subsequent Light Scattering experiments. Cells were investigated after isolation: on the right side the scatter plot (FSC vs SSC) is shown. The position of events (cells) on the scatterplot indicates CD4+ and CD8+ share the same area when investigated on the morphologic base alone: flow cytometer is not sensitive enough to discriminate them on morphologic base. On the left side fluorescence intensity indicating the degree of purity of the isolation is shown. Isolated CD4+ (upper line) were labeled with two Ab: Ab anti CD4 (red) showing positivity and Ab anti CD8+ (grey), showing negativity. Isolated CD8+ were labeled with two Ab: Ab anti Cd8+ (blue) showing positivity and Ab anti CD4 (grey) showing negativity. Please note that for both cell subclasses we performed two different runs with same instrument settings, and then we overlapped results.

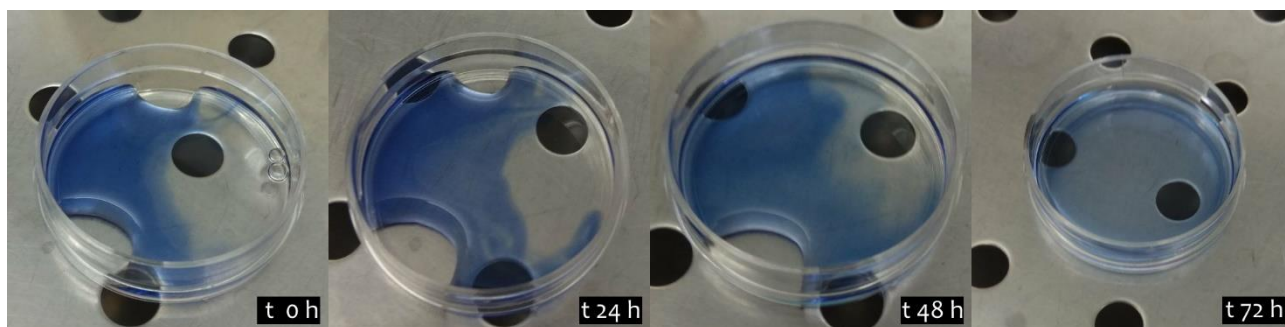

**Supplementary fig. 2** Test for static mixing between water-based dye solution and viscoelastic alignment solution was performed. The two liquids were in contact, without any external force applied to enhance the mixing, and monitored over time. The complete mixing of the two liquids takes place at 72 h.

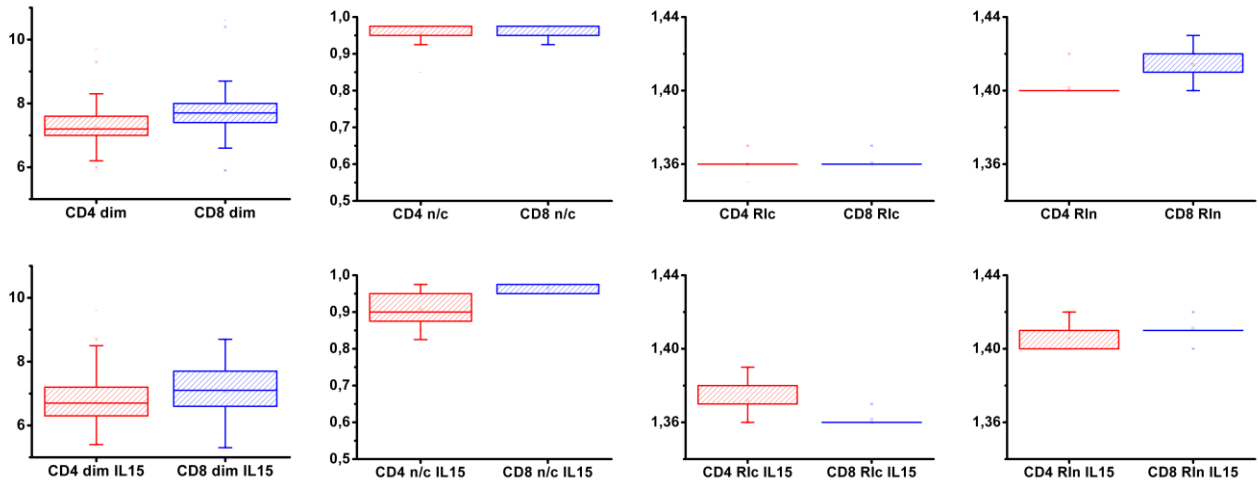

**Supplementary fig. 3** Variations of biophysical properties of unstimulated vs stimulated CD4+ and CD8+. Cells were measured with blue laser. CD4+: red boxes, CD8+: blue boxes. Please note that the graph refers to values of biophysical properties of cell of donor 1: details on overlap of distributions of biophysical properties for each donor can be found in supplementary information, table 1.

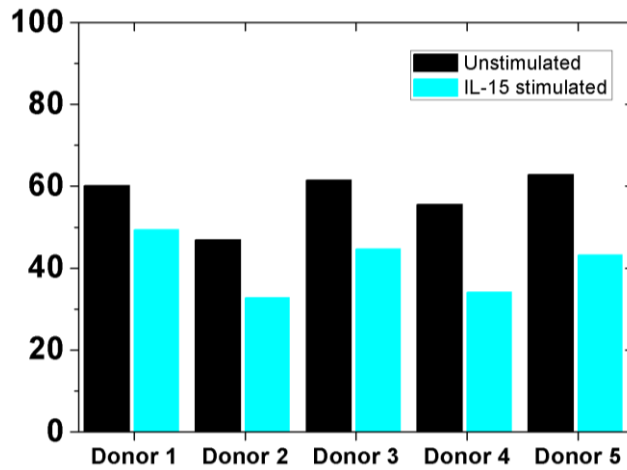

**Supplementary fig. 4** PDF overlapping for all donors (unstimulated versus IL-15 stimulated cells).

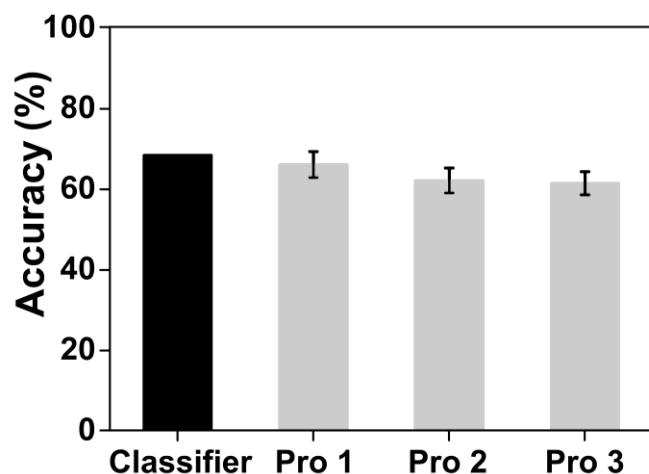

**Supplementary fig. 5** Overall accuracy of ML approach performed on three different probands. The trained classifier for unstimulated CD4+ and CD8+ cells (red laser - indicated in black) was applied on different proband data and classifier accuracy was calculated. Results show similar outcomes for all probands compared to the used trained classifier. (Trained classifier: 68.49%; Pro 1: 66.13% ± 3.23; Pro 2: 62.21% ± 3.10; Pro 3: 61.52% ± 2.86).

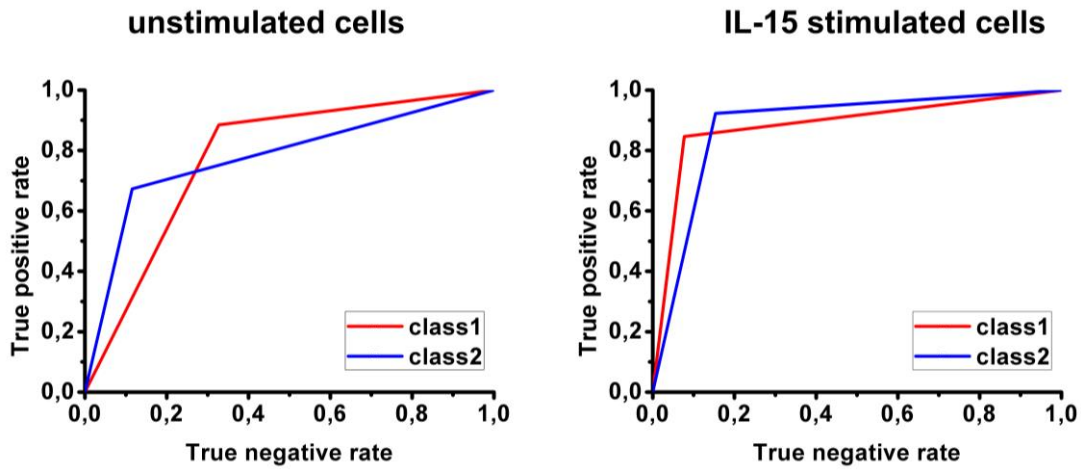

**Supplementary fig. 6** Receiver Operating Characteristic (ROC) curves of ML trainings, showing True positive rate vs True negative rate for both subclasses of T-lymphocytes (CD4+ and CD8+).

**Supplementary table 1.** Values of biophysical properties of CD4+ and CD8+ from all donors, together with values of PDF overlapping below.

|                              | CD4+                        | CD8+            | CD4+            | CD8+            | CD4+            | CD8+            | CD4+            | CD8+            |                |
|------------------------------|-----------------------------|-----------------|-----------------|-----------------|-----------------|-----------------|-----------------|-----------------|----------------|
|                              | dimension ( $\mu\text{m}$ ) |                 | n/c ratio       |                 | $RI_c$          |                 | $RI_n$          |                 |                |
| <b>unstimulated cells</b>    |                             |                 |                 |                 |                 |                 |                 |                 | <b>average</b> |
| donor 1<br>(male, 33)        | 7.18 $\pm$ 0.60             | 7.51 $\pm$ 0.82 | 0.96 $\pm$ 0.02 | 0.96 $\pm$ 0.01 | 1.36 $\pm$ 0.00 | 1.36 $\pm$ 0.00 | 1.40 $\pm$ 0.00 | 1.41 $\pm$ 0.01 | 60.15%         |
|                              | 73.50%                      |                 | 73.14%          |                 | 71.59%          |                 | 22.36%          |                 |                |
| donor 2<br>(female, 35)      | 7.25 $\pm$ 0.76             | 7.13 $\pm$ 0.57 | 0.95 $\pm$ 0.02 | 0.97 $\pm$ 0.01 | 1.36 $\pm$ 0.00 | 1.36 $\pm$ 0.00 | 1.40 $\pm$ 0.00 | 1.41 $\pm$ 0.01 | 46.90%         |
|                              | 84.89%                      |                 | 51.05%          |                 | 37.51%          |                 | 14.15%          |                 |                |
| donor 3<br>(male, 35)        | 7.24 $\pm$ 0.67             | 7.06 $\pm$ 0.78 | 0.95 $\pm$ 0.02 | 0.97 $\pm$ 0.01 | 1.36 $\pm$ 0.00 | 1.36 $\pm$ 0.00 | 1.40 $\pm$ 0.00 | 1.41 $\pm$ 0.00 | 61.50%         |
|                              | 87.73%                      |                 | 46.15%          |                 | 100.00%         |                 | 12.14%          |                 |                |
| donor 4<br>(female, 27)      | 7.24 $\pm$ 0.67             | 7.17 $\pm$ 0.53 | 0.96 $\pm$ 0.01 | 0.97 $\pm$ 0.01 | 1.36 $\pm$ 0.00 | 1.36 $\pm$ 0.00 | 1.40 $\pm$ 0.00 | 1.41 $\pm$ 0.01 | 55.56%         |
|                              | 87.13%                      |                 | 77.85%          |                 | 81.38%          |                 | 13.89%          |                 |                |
| donor 5<br>(male, 36)        | 6.99 $\pm$ 0.54             | 7.20 $\pm$ 0.88 | 0.95 $\pm$ 0.02 | 0.97 $\pm$ 0.01 | 1.36 $\pm$ 0.00 | 1.36 $\pm$ 0.00 | 1.40 $\pm$ 0.00 | 1.40 $\pm$ 0.01 | 62.82%         |
|                              | 74.32%                      |                 | 49.39%          |                 | 100.00%         |                 | 27.59%          |                 |                |
| <b>average</b>               | 7.18 $\pm$ 0.11             | 7.21 $\pm$ 0.18 | 0.95 $\pm$ 0.00 | 0.97 $\pm$ 0.00 | 1.36 $\pm$ 0.00 | 1.36 $\pm$ 0.00 | 1.40 $\pm$ 0.00 | 1.41 $\pm$ 0.00 |                |
| <b>IL-15 stimulatd cells</b> |                             |                 |                 |                 |                 |                 |                 |                 | <b>average</b> |
| donor 1<br>(male, 33)        | 7.29 $\pm$ 0.59             | 7.61 $\pm$ 0.67 | 0.95 $\pm$ 0.02 | 0.97 $\pm$ 0.01 | 1.36 $\pm$ 0.00 | 1.36 $\pm$ 0.00 | 1.40 $\pm$ 0.00 | 1.41 $\pm$ 0.01 | 49.43%         |
|                              | 81.25%                      |                 | 19.49%          |                 | 34.13%          |                 | 62.41%          |                 |                |
| donor 2<br>(female, 35)      | 7.22 $\pm$ 0.66             | 7.38 $\pm$ 0.82 | 0.95 $\pm$ 0.01 | 0.97 $\pm$ 0.01 | 1.37 $\pm$ 0.00 | 1.36 $\pm$ 0.00 | 1.40 $\pm$ 0.00 | 1.41 $\pm$ 0.00 | 32.74%         |
|                              | 86.34%                      |                 | 36.78%          |                 | 0.54%           |                 | 7.28%           |                 |                |
| donor 3<br>(male, 35)        | 7.32 $\pm$ 0.75             | 7.41 $\pm$ 0.68 | 0.95 $\pm$ 0.02 | 0.96 $\pm$ 0.01 | 1.37 $\pm$ 0.00 | 1.36 $\pm$ 0.00 | 1.40 $\pm$ 0.01 | 1.41 $\pm$ 0.01 | 44.68%         |
|                              | 93.20%                      |                 | 53.37%          |                 | 7.80%           |                 | 20.33%          |                 |                |
| donor 4<br>(female, 27)      | 7.44 $\pm$ 0.83             | 7.34 $\pm$ 0.75 | 0.95 $\pm$ 0.01 | 0.97 $\pm$ 0.01 | 1.37 $\pm$ 0.00 | 1.36 $\pm$ 0.00 | 1.40 $\pm$ 0.00 | 1.41 $\pm$ 0.01 | 34.14%         |
|                              | 92.99%                      |                 | 32.44%          |                 | 4.90%           |                 | 6.22%           |                 |                |
| donor 5<br>(male, 36)        | 7.40 $\pm$ 1.14             | 7.65 $\pm$ 1.07 | 0.95 $\pm$ 0.02 | 0.96 $\pm$ 0.02 | 1.37 $\pm$ 0.00 | 1.36 $\pm$ 0.00 | 1.40 $\pm$ 0.00 | 1.41 $\pm$ 0.00 | 43.24%         |
|                              | 89.33%                      |                 | 56.33%          |                 | 15.39%          |                 | 11.92%          |                 |                |
| <b>average</b>               | 7.33 $\pm$ 0.09             | 7.48 $\pm$ 0.14 | 0.95 $\pm$ 0.00 | 0.97 $\pm$ 0.01 | 1.37 $\pm$ 0.00 | 1.36 $\pm$ 0.00 | 1.40 $\pm$ 0.00 | 1.41 $\pm$ 0.00 |                |

**Supplementary table 2.** Comparison between ML trained classifier outcomes of unstimulated cells with red versus blue laser.

| Red laser - training |             |             |               |
|----------------------|-------------|-------------|---------------|
|                      | CD4+        | CD8+        | precision     |
| CD4+                 | 248         | 16          | 93.94%        |
| CD8+                 | 151         | 115         | 43.23%        |
|                      | sensitivity | specificity | accuracy      |
|                      | 62.16%      | 87.79%      | <b>68.49%</b> |

| Blue laser - training |             |             |               |
|-----------------------|-------------|-------------|---------------|
|                       | CD4+        | CD8+        | precision     |
| CD4+                  | 483         | 63          | 88.46%        |
| CD8+                  | 144         | 296         | 67.27%        |
|                       | sensitivity | specificity | accuracy      |
|                       | 77.03%      | 82.45%      | <b>79.01%</b> |

**Supplementary table 3.** Results of ML on unstimulated and stimulated cells for all donors.

| unstimulated cells |             |             |          |              |             |             |          |
|--------------------|-------------|-------------|----------|--------------|-------------|-------------|----------|
| training           |             |             |          | test donor 1 |             |             |          |
| CD4+               | 483         | 63          | 88.46%   | CD4+         | 106         | 36          | 74.56%   |
| CD8+               | 144         | 296         | 67.27%   | CD8+         | 77          | 104         | 57.46%   |
|                    | sensitivity | specificity | accuracy |              | sensitivity | specificity | accuracy |
|                    | 77.03%      | 82.45%      | 79.01%   |              | 57.92%      | 74.29%      | 65.02%   |
| test donor 2       |             |             |          |              |             |             |          |
| CD4+               | 77          | 43          | 64.17%   | CD4+         | 77          | 43          | 64.17%   |
| CD8+               | 21          | 70          | 76.92%   | CD8+         | 21          | 70          | 76.92%   |
|                    | sensitivity | specificity | accuracy |              | sensitivity | specificity | accuracy |
|                    | 78.57%      | 61.95%      | 69.97%   |              | 78.57%      | 61.95%      | 69.97%   |
| test donor 3       |             |             |          |              |             |             |          |
| CD4+               | 76          | 8           | 74.16%   | CD4+         | 76          | 8           | 74.16%   |
| CD8+               | 13          | 54          | 79.03%   | CD8+         | 13          | 54          | 79.03%   |
|                    | sensitivity | specificity | accuracy |              | sensitivity | specificity | accuracy |
|                    | 85.54%      | 68.06%      | 76.16%   |              | 85.54%      | 68.06%      | 76.16%   |
| test donor 4       |             |             |          |              |             |             |          |
| CD4+               | 115         | 6           | 82.08%   | CD4+         | 115         | 6           | 82.08%   |
| CD8+               | 25          | 76          | 54.31%   | CD8+         | 25          | 76          | 54.31%   |
|                    | sensitivity | specificity | accuracy |              | sensitivity | specificity | accuracy |
|                    | 62.14%      | 76.83%      | 67.57%   |              | 62.14%      | 76.83%      | 67.57%   |
| test donor 5       |             |             |          |              |             |             |          |
| CD4+               | 129         | 11          | 92.14%   | CD4+         | 129         | 11          | 92.14%   |
| CD8+               | 55          | 48          | 46.60%   | CD8+         | 55          | 48          | 46.60%   |
|                    | sensitivity | specificity | accuracy |              | sensitivity | specificity | accuracy |
|                    | 70.11%      | 81.36%      | 72.84%   |              | 70.11%      | 81.36%      | 72.84%   |
| stimulated cells   |             |             |          |              |             |             |          |
| training           |             |             |          | test donor 1 |             |             |          |
| CD4+               | 176         | 32          | 84.62%   | CD4+         | 38          | 12          | 76.00%   |
| CD8+               | 13          | 155         | 92.26%   | CD8+         | 7           | 54          | 88.52%   |
|                    | sensitivity | specificity | accuracy |              | sensitivity | specificity | accuracy |
|                    | 93.12%      | 82.89%      | 88.03%   |              | 84.44%      | 81.82%      | 82.88%   |
| test donor 2       |             |             |          |              |             |             |          |
| CD4+               | 96          | 4           | 69.00%   | CD4+         | 96          | 4           | 69.00%   |
| CD8+               | 15          | 58          | 79.45%   | CD8+         | 15          | 58          | 79.45%   |
|                    | sensitivity | specificity | accuracy |              | sensitivity | specificity | accuracy |
|                    | 86.49%      | 93.55%      | 89.02%   |              | 86.49%      | 93.55%      | 89.02%   |
| test donor 3       |             |             |          |              |             |             |          |
| CD4+               | 115         | 25          | 82.14%   | CD4+         | 115         | 25          | 82.14%   |
| CD8+               | 21          | 78          | 78.79%   | CD8+         | 21          | 78          | 78.79%   |
|                    | sensitivity | specificity | accuracy |              | sensitivity | specificity | accuracy |
|                    | 84.56%      | 75.73%      | 80.75%   |              | 84.56%      | 75.73%      | 80.75%   |
| test donor 4       |             |             |          |              |             |             |          |
| CD4+               | 84          | 3           | 96.55%   | CD4+         | 84          | 3           | 96.55%   |
| CD8+               | 17          | 105         | 86.07%   | CD8+         | 17          | 105         | 86.07%   |
|                    | sensitivity | specificity | accuracy |              | sensitivity | specificity | accuracy |
|                    | 83.17%      | 97.22%      | 90.43%   |              | 83.17%      | 97.22%      | 90.43%   |
| test donor 5       |             |             |          |              |             |             |          |
| CD4+               | 56          | 11          | 83.58%   | CD4+         | 56          | 11          | 83.58%   |
| CD8+               | 5           | 52          | 91.23%   | CD8+         | 5           | 52          | 91.23%   |
|                    | sensitivity | specificity | accuracy |              | sensitivity | specificity | accuracy |
|                    | 91.80%      | 82.54%      | 87.10%   |              | 91.80%      | 82.54%      | 87.10%   |

**Supplementary table 4.** Comparison between ML trained classifier outcomes with blue laser with IL-15 stimulated cells at three different times: 0 minutes (NO IL-15), 30 minutes and 240 minutes.

| 0 minutes (NO IL-15) - training |             |             |               | 30 minutes - training |             |             |               | 240 minutes - training |             |             |               |
|---------------------------------|-------------|-------------|---------------|-----------------------|-------------|-------------|---------------|------------------------|-------------|-------------|---------------|
|                                 | CD4+        | CD8+        | precision     |                       | CD4+        | CD8+        | precision     |                        | CD4+        | CD8+        | precision     |
| CD4+                            | 483         | 63          | 88.46%        | CD4+                  | 176         | 32          | 84.62%        | CD4+                   | 372         | 37          | 90.95%        |
| CD8+                            | 144         | 296         | 82.45%        | CD8+                  | 13          | 155         | 92.89%        | CD8+                   | 45          | 453         | 89.12%        |
|                                 | sensitivity | specificity | accuracy      |                       | sensitivity | specificity | accuracy      |                        | sensitivity | specificity | accuracy      |
|                                 | 77.03%      | 82.45%      | <b>79.01%</b> |                       | 93.12%      | 82.89%      | <b>88.03%</b> |                        | 82.91%      | 92.45%      | <b>90.96%</b> |

**Supplementary table 5.** ML results on mixed samples for each donor.

|         | cells<br>(Neubauer<br>chamber) |      | CV (%) | MIX A<br>(CD4+/CD8+<br>= 2.5) | MIX C<br>(CD4+/CD8+<br>= 1.0) | MIX B<br>(CD4+/CD8+<br>= 0.5) | MIX A<br>(CD4+/CD8+<br>= 2.5) | MIX C<br>(CD4+/CD8+<br>= 1.0) | MIX B<br>(CD4+/CD8+<br>= 0.5) |
|---------|--------------------------------|------|--------|-------------------------------|-------------------------------|-------------------------------|-------------------------------|-------------------------------|-------------------------------|
|         |                                |      |        | unstimulated cells            |                               |                               | IL-15 stimulated cells        |                               |                               |
|         | CD4+                           | CD8+ |        | ML result                     |                               |                               | ML result                     |                               |                               |
| donor 1 | 191                            | 163  | 5.3%   | 1.68 ± 0.13<br>p = 0.005      | 0.67 ± 0.04<br>p = 0.02       | 0.48 ± 0.12<br>p = 0.78       | 2.35 ± 0.08<br>p = 0.3        | 1.02 ± 0.07<br>p = 0.9        | 0.49 ± 0.01<br>p = 0.7        |
| donor 2 | 184                            | 172  | 5.3%   | 3.10 ± 0.05<br>p = 0.01       | 0.86 ± 0.07<br>p = 0.01       | 1.58 ± 0.23<br>p = 0.03       | 2.65 ± 0.34<br>p = 0.33       | 0.55 ± 0.09<br>p = 0.32       | 1.00 ± 0.09<br>p = 0.86       |
| donor 3 | 149                            | 117  | 6.1%   | 1.95 ± 0.04<br>p = 0.01       | 0.68 ± 0.09<br>p = 0.03       | 1.06 ± 0.19<br>p = 0.52       | 2.17 ± 0.35<br>p = 0.1        | 0.45 ± 0.1<br>p = 0.37        | 0.90 ± 0.13<br>p = 0.17       |
| donor 4 | 216                            | 205  | 4.9%   | 2.11 ± 0.42<br>p = 0.15       | 0.90 ± 0.21<br>p = 0.21       | 1.53 ± 0.12<br>p = 0.005      | 2.77 ± 0.29<br>p = 0.10       | 0.50 ± 0.02<br>p = 0.72       | 1.00 ± 0.11<br>p = 0.98       |
| donor 5 | 104                            | 98   | 7.0%   | 2.78 ± 0.54<br>p = 0.32       | 1.08 ± 0.20<br>p = 0.03       | 1.25 ± 0.29<br>p = 0.22       | 2.16 ± 1.00<br>p = 0.55       | 0.56 ± 0.18<br>p = 0.54       | 0.96 ± 0.23<br>p = 0.71       |
